# Supplementary material
Source: Springer Nature journal article supplement (https://www.springermedizin.de/resource/supplementary/12891_2014_2394_MOESM15_ESM.pdf/9510004)

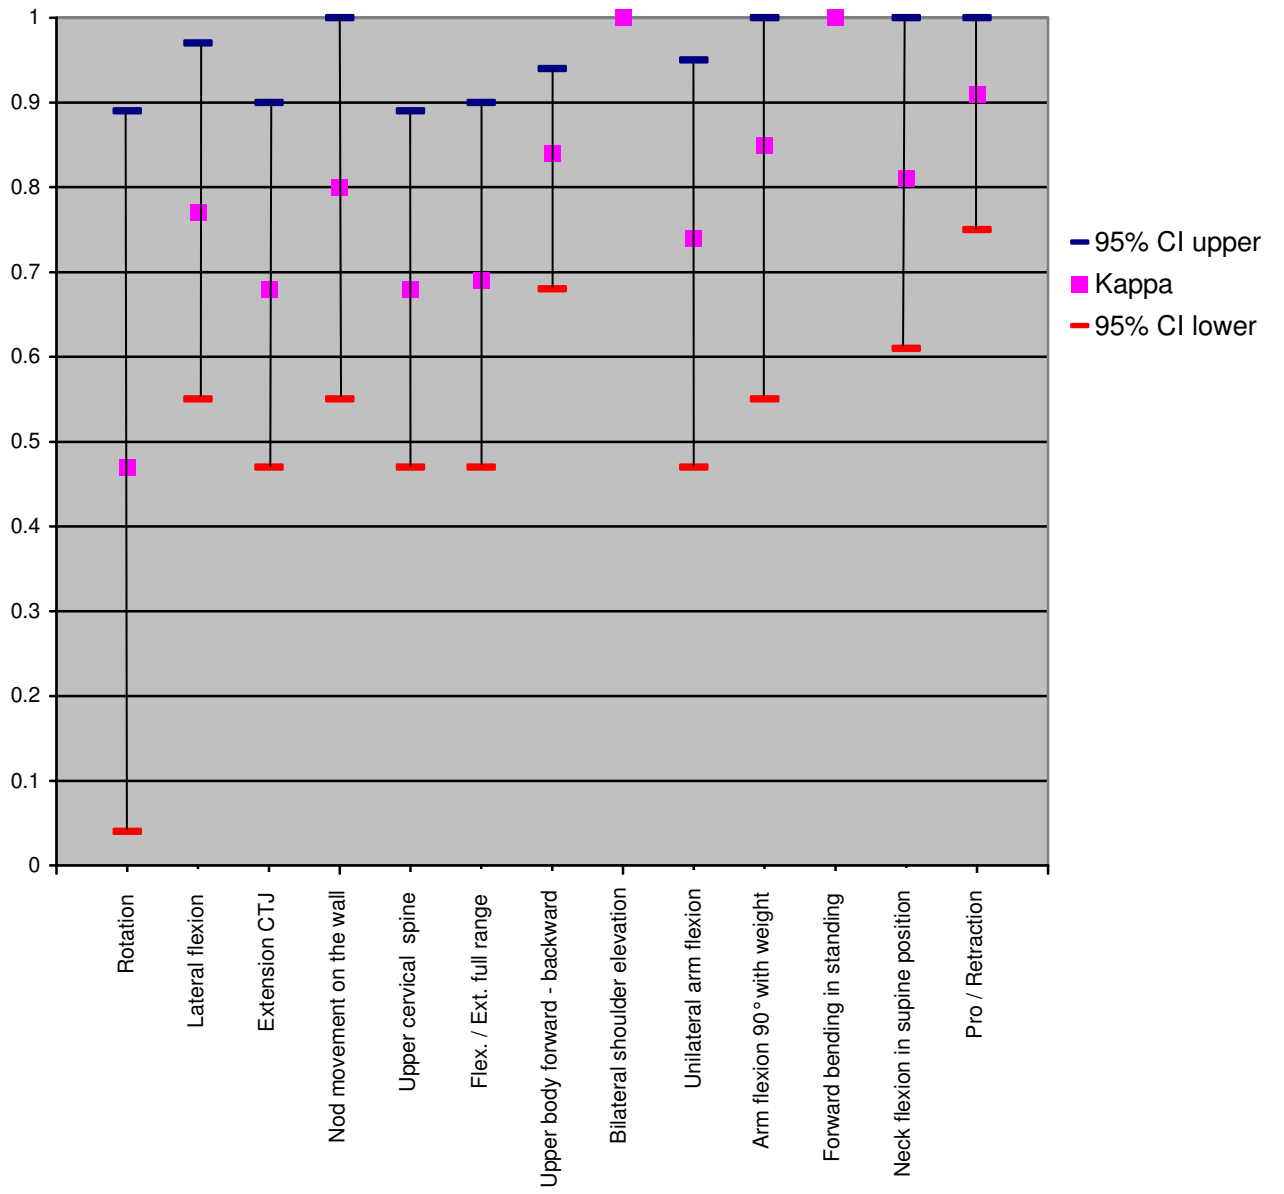

Supplement: MOESM15 [file 9510004]
